# Supplementary material
Source: PubMed Central journal article supplement (PMC10863408)

## Supplemental Figure legends

### Fig. S1: Absolute abundance of OMM<sup>12</sup> bacteria during *S. Tm* infection. Related to Fig. 1 and 2.

Analysis of microbiota composition in fecal samples at different time points p.i.. Microbiota composition was determined by strain-specific qPCR assay and is shown as absolute abundances of the individual strains (16S rRNA gene copy numbers/ $\mu$ l genomic DNA). **(A)** *B. caecimuris* I48. **(B)** *M. intestinale* YL27. **(C)** *A. muciniphila* YL44. **(D)** *T. muris* YL45. **(E)** *L. reuteri* I49. **(F)** *E. faecalis* KB1. **(G)** *B. coccoides* YL58. **(H)** *C. innocuum* I46. **(I)** *F. plautii* YL31. **(J)** *E. clostridioformis* YL32. **(K)** *A. muris* KB18. **(L)** *B. animals* YL2.

**Fig. S2: Microbiota composition in the course of *S. Tm*<sup>WT</sup> and *S. Tm*<sup>avir</sup> infection in OMM<sup>12</sup> mice.** **(A)** Analysis of microbiota composition in fecal samples at indicated time points. Microbiota composition was determined by strain-specific qPCR assay and is shown as relative abundances of the individual strains (% of cumulated 16S rRNA gene copy numbers). **(B)** PCoA based on the distance matrix of Bray-Curtis dissimilarity of relative OMM<sup>12</sup> abundance profiles shows the effect of time after infection. Points are colored by time (days) after infection. **(C)** Relative abundance of *S. Tm* in cecal contents at different time points. **(D)** Absolute amount of 16S rRNA gene copies (determined by an universal primer / probe combination). Statistical analysis was performed using Kruskal-Wallis test with Dunn's multiple comparison test (\* p<0.05, \*\* p<0.01, \*\*\* p<0.001). Each dot represents one mouse, black lines indicate median, grey lines indicate detection limit (DTL).

**Fig. S3: *S. Tm* requires functional T3SS-1 and 2 to induce dysbiosis at day 4 p.i..** Experimental set-up: OMM<sup>12</sup> mice were orally infected with 5 x 10<sup>7</sup> CFUs of either *S. Tm*<sup>avir</sup> ( $\Delta$ *invG*, *sseD::aphT*), *S. Tm*<sup>SPI-1</sup> ( $\Delta$ *invG*), *S. Tm*<sup>SPI-2</sup> (*sseD::aphT*) or with *S. Tm*<sup>WT</sup>. Data from infections with *S. Tm*<sup>avir</sup> and *S. Tm*<sup>WT</sup> originate from the previous experiment (Fig. 2). Mice were sacrificed at day 4 p.i. and samples were taken for analysis. There was also a fecal control sample taken before infection. **(A)** *Salmonella* loads in cecal content at day 4 p.i. (CFUs *S. Tm* / g content). **(B)** Lipocalin-2 levels in cecal content at day 4 p.i. measured by ELISA (ng / mg cecal content). **(C)** Cecal pathology determined by evaluation of HE stained tissue sections. **(D)** Analysis of microbiota composition in feces (left) and cecal content (right) at day 4 p.i. with different *S. Tm* mutants. Microbiota composition is shown as relative abundance and expressed as % of cumulated 16S rRNA gene copy numbers (% of total 16S rRNA gene copies). The amount of absolute 16S rRNA gene copies (determined by an universal primer / probe combination) is illustrated as black dots (the right y axis). \* Limit of detection. **(E)** Cluster analysis of fecal (upper section) and cecal (lower section) microbiota composition after infection with different *Salmonella* strains. The analysis is based on Pearson distance matrix visualized as PCoA plots. Grouping by infection with different *Salmonella* strains was significant (feces and cecal content: p<0.001, Adonis) with 86% (feces) and 85% (cecal content) of variation explained. PERMDISP analyses revealed statistically significant differences in microbiota composition after infection with *S. Tm*<sup>avir</sup>, *S. Tm*<sup>WT</sup> in feces and after

infection with *S. Tm*<sup>avir</sup>, *S. Tm*<sup>SPI-1</sup> and *S. Tm*<sup>WT</sup> in cecal content (\* p<0.05, \*\* p<0.01, \*\*\* p<0.001). **(F)** Systemic *Salmonella* loads in mesenteric lymphnodes, liver and spleen (CFUs per organ) at day 4 p.i.. Relative cecum weight at day 4 p.i. is expressed as % of body weight. Data are indicated as the median. Statistical analysis between groups was performed using Kruskal-Wallis test with Dunn's multiple comparison test (\* p<0.05, \*\* p<0.01, \*\*\* p<0.001). # Animal that exhibited dysbiosis after infection with *S. Tm*<sup>SPI-2</sup>. Dashed lines: DTL: limit of detection (mLN: 10 CFUs, liver: 60 CFUs, spleen: 20 CFUs).

**Fig. S4: Organ loads and microbiota composition of OMM<sup>12</sup> mice infected with *S. Tm* mutants in T3SS-1 and 2.** Experimental setup: see Fig. S3. *S. Tm* loads in **(A)** mesenteric lymphnodes, **(B)** liver and **(C)** spleen at day 4 p.i. were determined by plating. Microbiota composition was determined by strain-specific qPCR assay and is shown as absolute abundances of the individual strains (16S rRNA gene copy numbers/ $\mu$ l genomic DNA). **(D)** *B. caecimuris* I48. **(E)** *M. intestinale* YL27. **(F)** *A. muciniphila* YL44. **(G)** *T. muris* YL45. **(H)** *L. reuteri* I49. **(I)** *E. faecalis* KB1. **(J)** *B. coccoides* YL58. **(K)** *C. innocuum* I46. **(L)** *F. plautii* YL31. **(M)** *E. clostridioformis* YL32. **(N)** *A. muris* KB18. **(O)** *B. animals* YL2.

**Fig. S5: Organ loads of OMM<sup>12</sup> mice infected with *S. Tm* mutants.** Experimental setup: OMM<sup>12</sup> mice were infected with *S. Tm* mutants deficient in nitrate respiration (*S. Tm*<sup>Ni</sup>:  $\Delta narZ$ ; *narG*::*cat*; *napA*::*aphT*) and in nitrate and tetrathionate respiration (*S. Tm*<sup>Ni + Te</sup>;  $\Delta narZ$ ; *narG*::*cat*; *napA*::*aphT*; *ttrS*::*tet*), salmochelin production (*S. Tm* *entA*::*cat*; *S. Tm*<sup>EntA</sup>) and ethanolamine degradation (*eutC*::*aphT*; *S. Tm*<sup>EA</sup>) and *S. Tm*<sup>WT</sup> as control. *S. Tm* loads in **(A)** mesenteric lymphnodes, **(B)** liver and **(C)** spleen at day 4 p.i. were determined by plating.

**Fig. S6: Course of infection of a *S. Tm*<sup>CyxA</sup> mutant in OMM<sup>12</sup> mice.** OMM<sup>12</sup> mice were orally infected with different *S. Tm*<sup>CyxA</sup> (n=6) or *S. Tm*<sup>WT</sup> (n=5). Mice were sacrificed at day 4 post infection **(A)** *S. Tm* loads in feces and cecal content at days 1, 3 and 4 post infection were determined by plating. **(B)** Histopathological analysis of cecal tissue at day 4 p.i.. Cecal tissue sections of the mice were stained with hematoxylin/eosin to determine the degree of submucosal edema, neutrophil infiltration and epithelial damage (1–3: no pathological changes; 4–6: moderate inflammation; above 7: severe inflammation). *S. Tm* loads in the mesenteric lymph nodes **(C)**, liver **(D)** and spleen **(E)**. Analysis of microbiota composition in cecal content **(F)**. Microbiota composition was determined by strain-specific qPCR assay and is shown as relative abundances of the individual strains (% of cumulated 16S rRNA gene copy numbers). **(G)** PCoA based on the distance matrix of Bray-Curtis dissimilarity of relative OMM<sup>12</sup> abundance profiles shows the effect of the different *S. Tm* mutant strains. Points are colored by time (days) after infection. **(H)** Relative abundance of *S. Tm* and **(I)** absolute amount of 16S rRNA gene copies (determined by an universal primer / probe combination) in cecal contents 4 days p.i.. Statistical analysis was performed using Kruskal-Wallis test with Dunn's multiple comparison test (\* p<0.05, \*\* p<0.01, \*\*\* p<0.001). Each dot represents one mouse, black lines indicate median, grey lines indicate detection limit (DTL).

**Fig. S7: Absolute abundance of OMM<sup>12</sup> strains in mice infected with S. Tm mutants.** Related to Fig. 3 and Fig. S6. Analysis of microbiota composition in cecal content at day 4 p.i.. Microbiota composition was determined by strain-specific qPCR assay and is shown as absolute abundances of the individual strains (16S rRNA gene copy numbers/ $\mu$ l genomic DNA). (A) *B. caecimuris* I48. (B) *M. intestinale* YL27. (C) *A. muciniphila* YL44. (D) *T. muris* YL45. (E) *L. reuteri* I49. (F) *E. faecalis* KB1. (G) *B. coccoides* YL58. (H) *C. innocuum* I46. (I) *F. plautii* YL31. (J) *E. clostridioformis* YL32. (K) *A. muris* KB18. (L) *B. animals* YL2. Statistical analysis was performed using Kruskal-Wallis test with Dunn's multiple comparison test (\*  $p < 0.05$ , \*\*  $p < 0.01$ , \*\*\*  $p < 0.001$ ). Each dot represents one mouse, black lines indicate median, grey lines indicate detection limit (DTL).

**Fig. S8: Organ loads and microbiota composition of OMM<sup>12</sup> mice treated with one dose of  $\alpha$ -Ly6G antibody or isotype control and infected with S. Tm<sup>WT</sup>.** Experimental setup: see Fig. 4. S. Tm<sup>WT</sup> loads in (A) mesenteric lymphnodes, (B) liver and (C) spleen at day 4 p.i. were determined by plating. Microbiota composition was determined by strain-specific qPCR assay and is shown as absolute abundances of the individual strains (16S rRNA gene copy numbers/ $\mu$ l genomic DNA). (D) *B. caecimuris* I48. (E) *M. intestinale* YL27. (F) *A. muciniphila* YL44. (G) *T. muris* YL45. (H) *L. reuteri* I49. (I) *E. faecalis* KB1. (J) *B. coccoides* YL58. (K) *C. innocuum* I46. (L) *F. plautii* YL31. (M) *E. clostridioformis* YL32. (N) *A. muris* KB18. (O) *B. animals* YL2. Light and dark gray arrows indicate samples analyzed at day 2 or 3 p.i., respectively. Statistical analysis was performed using Mann Whitney test (\*  $p < 0.05$ , \*\*  $p < 0.01$ , \*\*\*  $p < 0.001$ ). Each dot represents one mouse, black lines indicate median, grey lines indicate detection limit (DTL).

**Figure S1**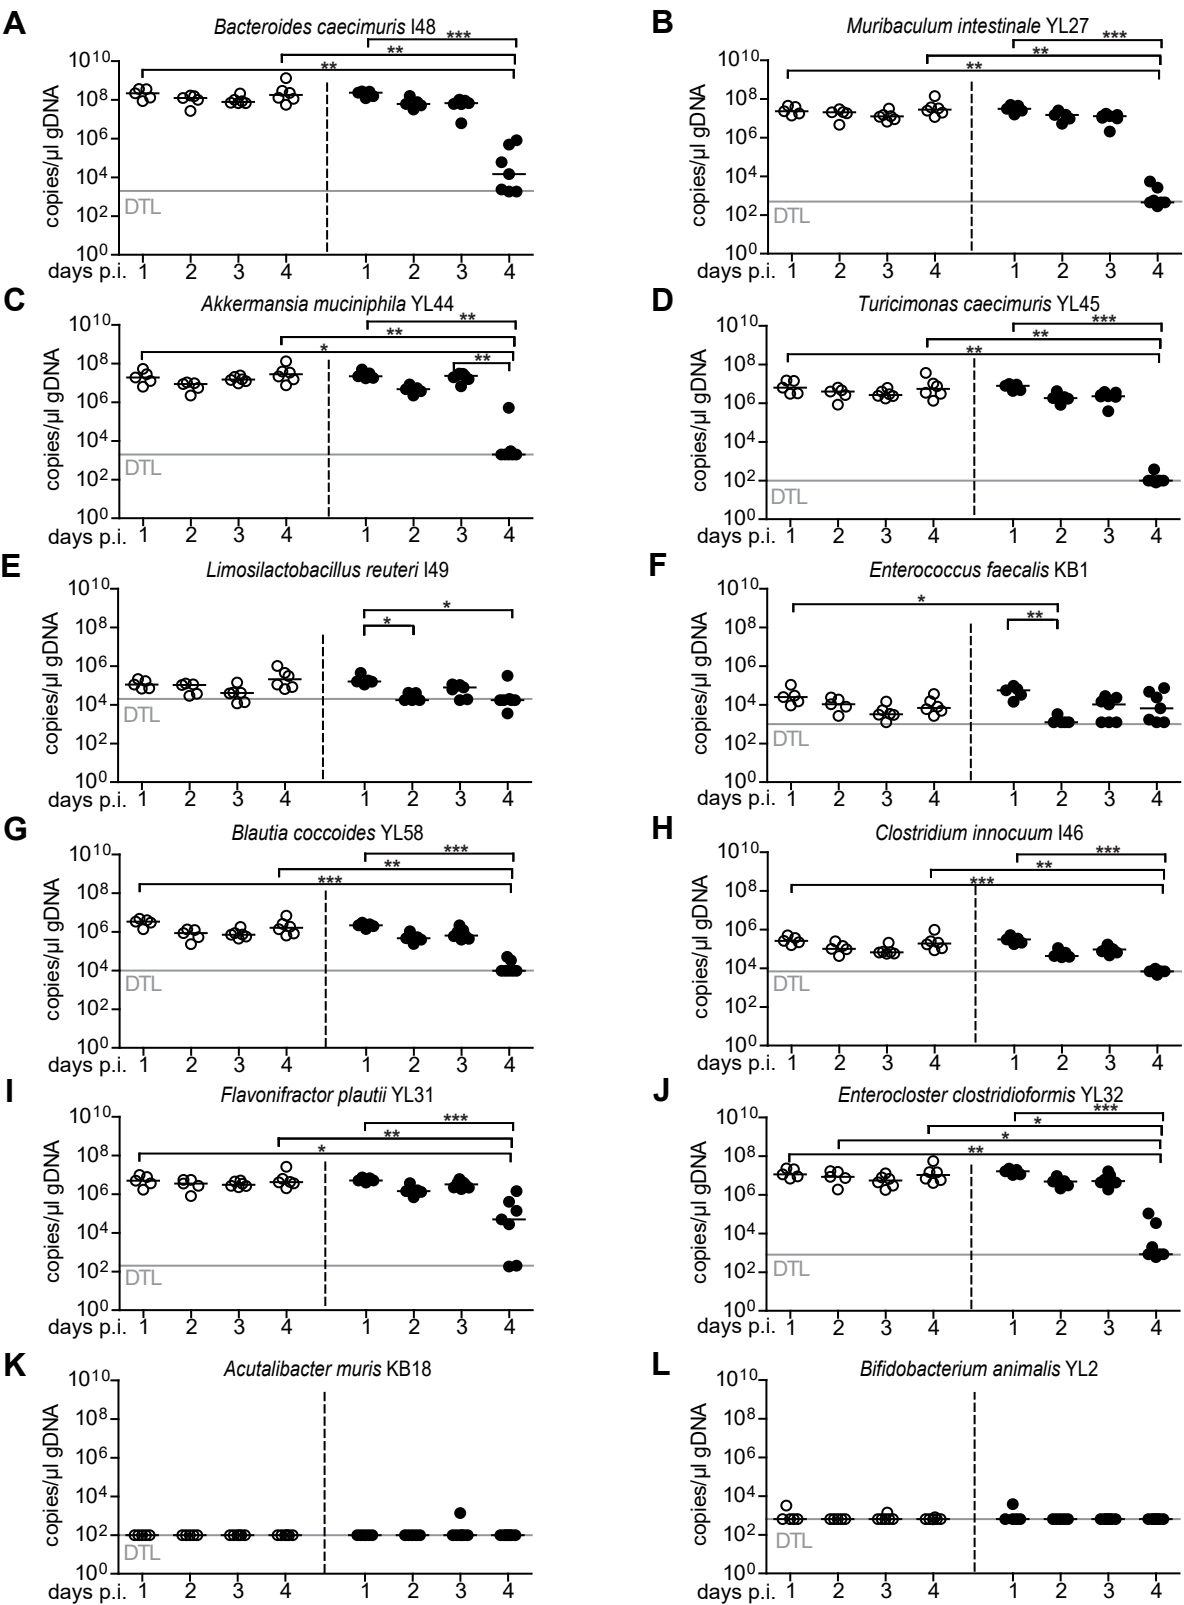

**Figure S2****A**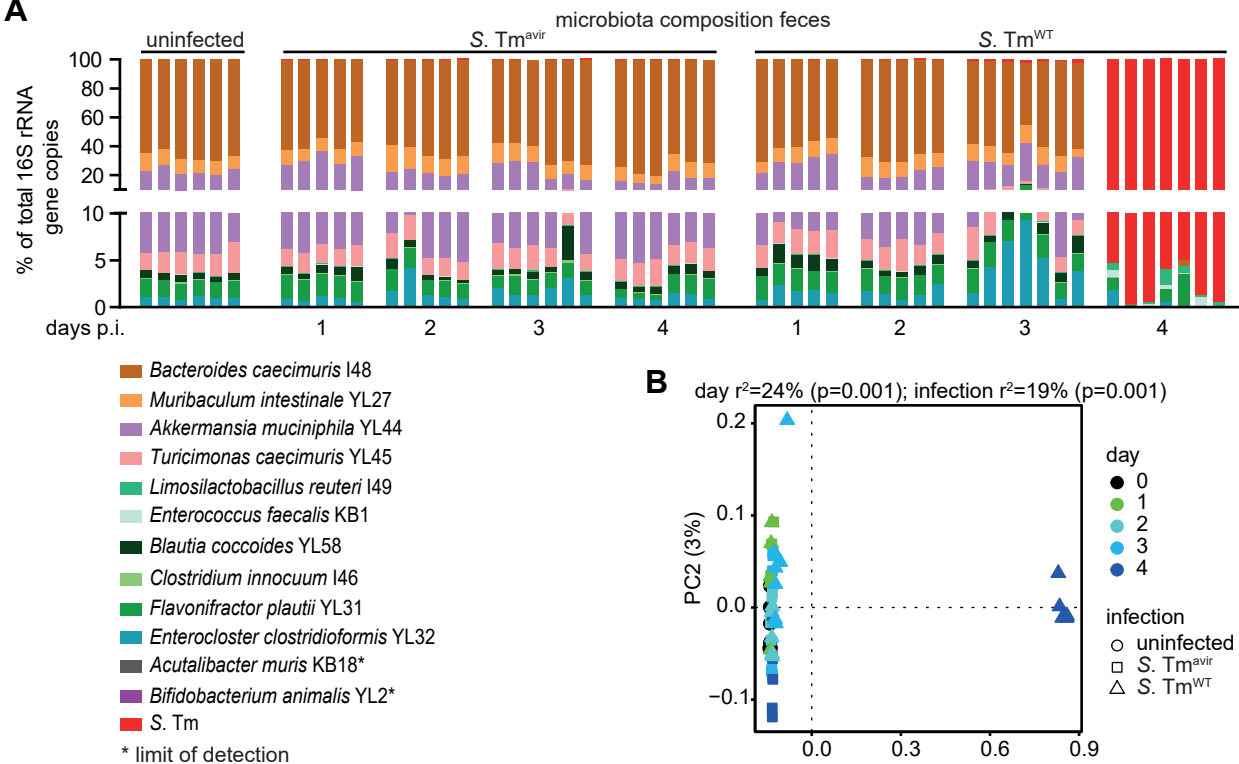**B**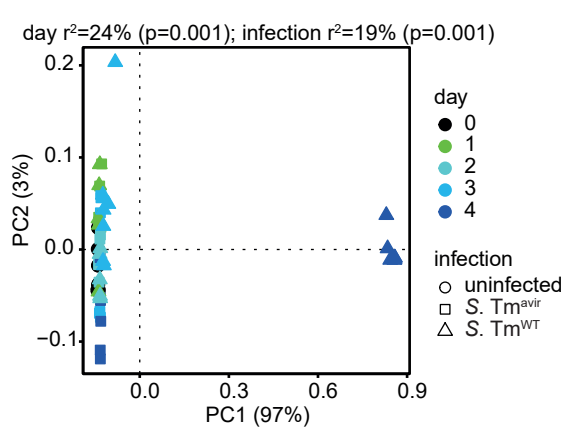**C**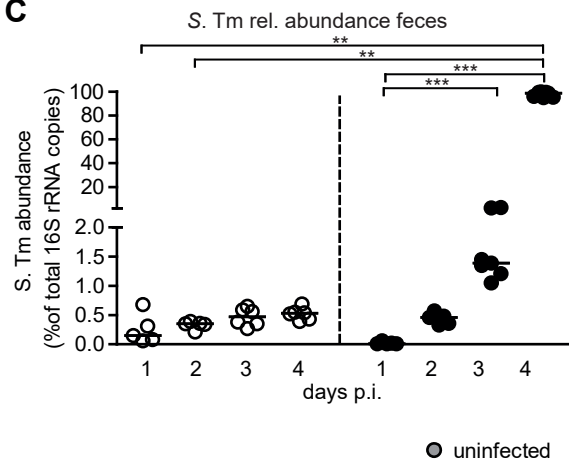**D**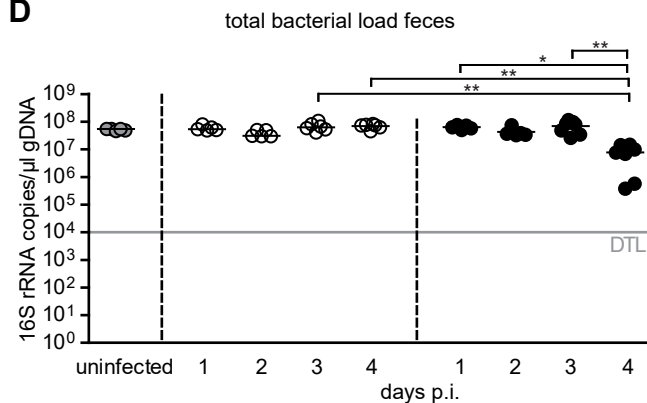

**Figure S3**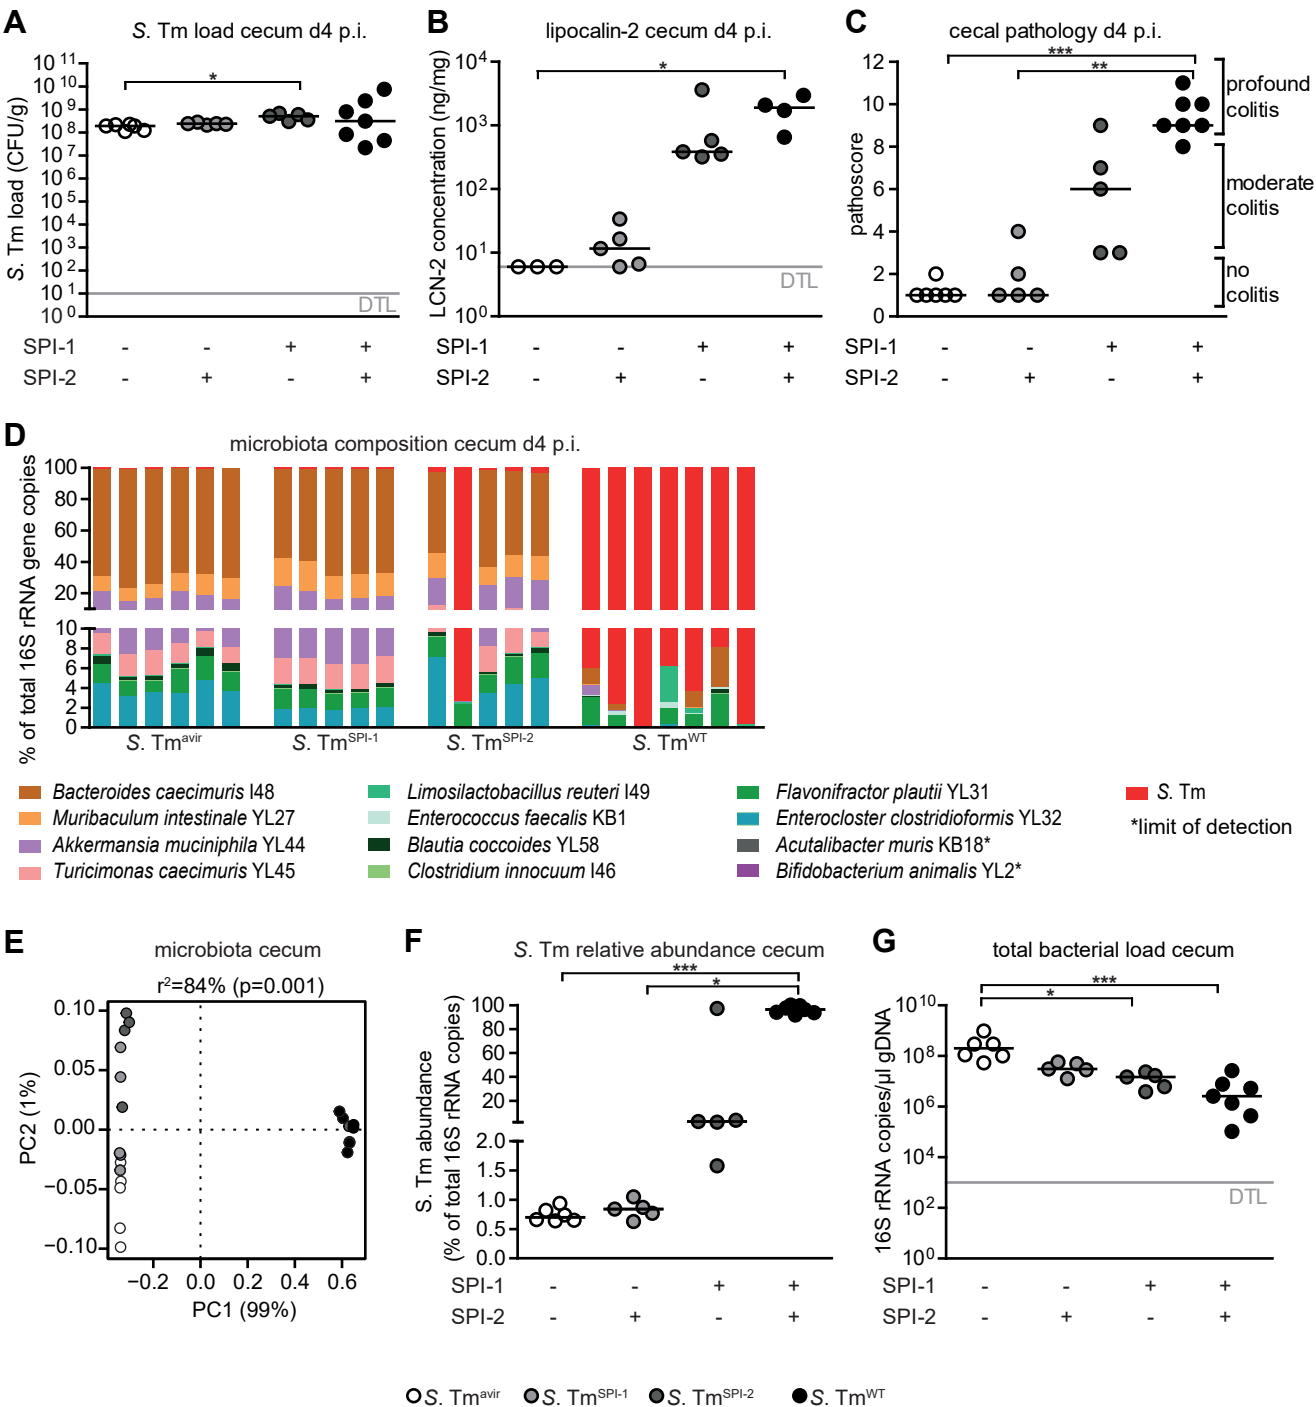

○ *S. Tm*<sup>avir</sup> ● *S. Tm*<sup>SPI-1</sup> ● *S. Tm*<sup>SPI-2</sup> ● *S. Tm*<sup>WT</sup>

**Figure S4**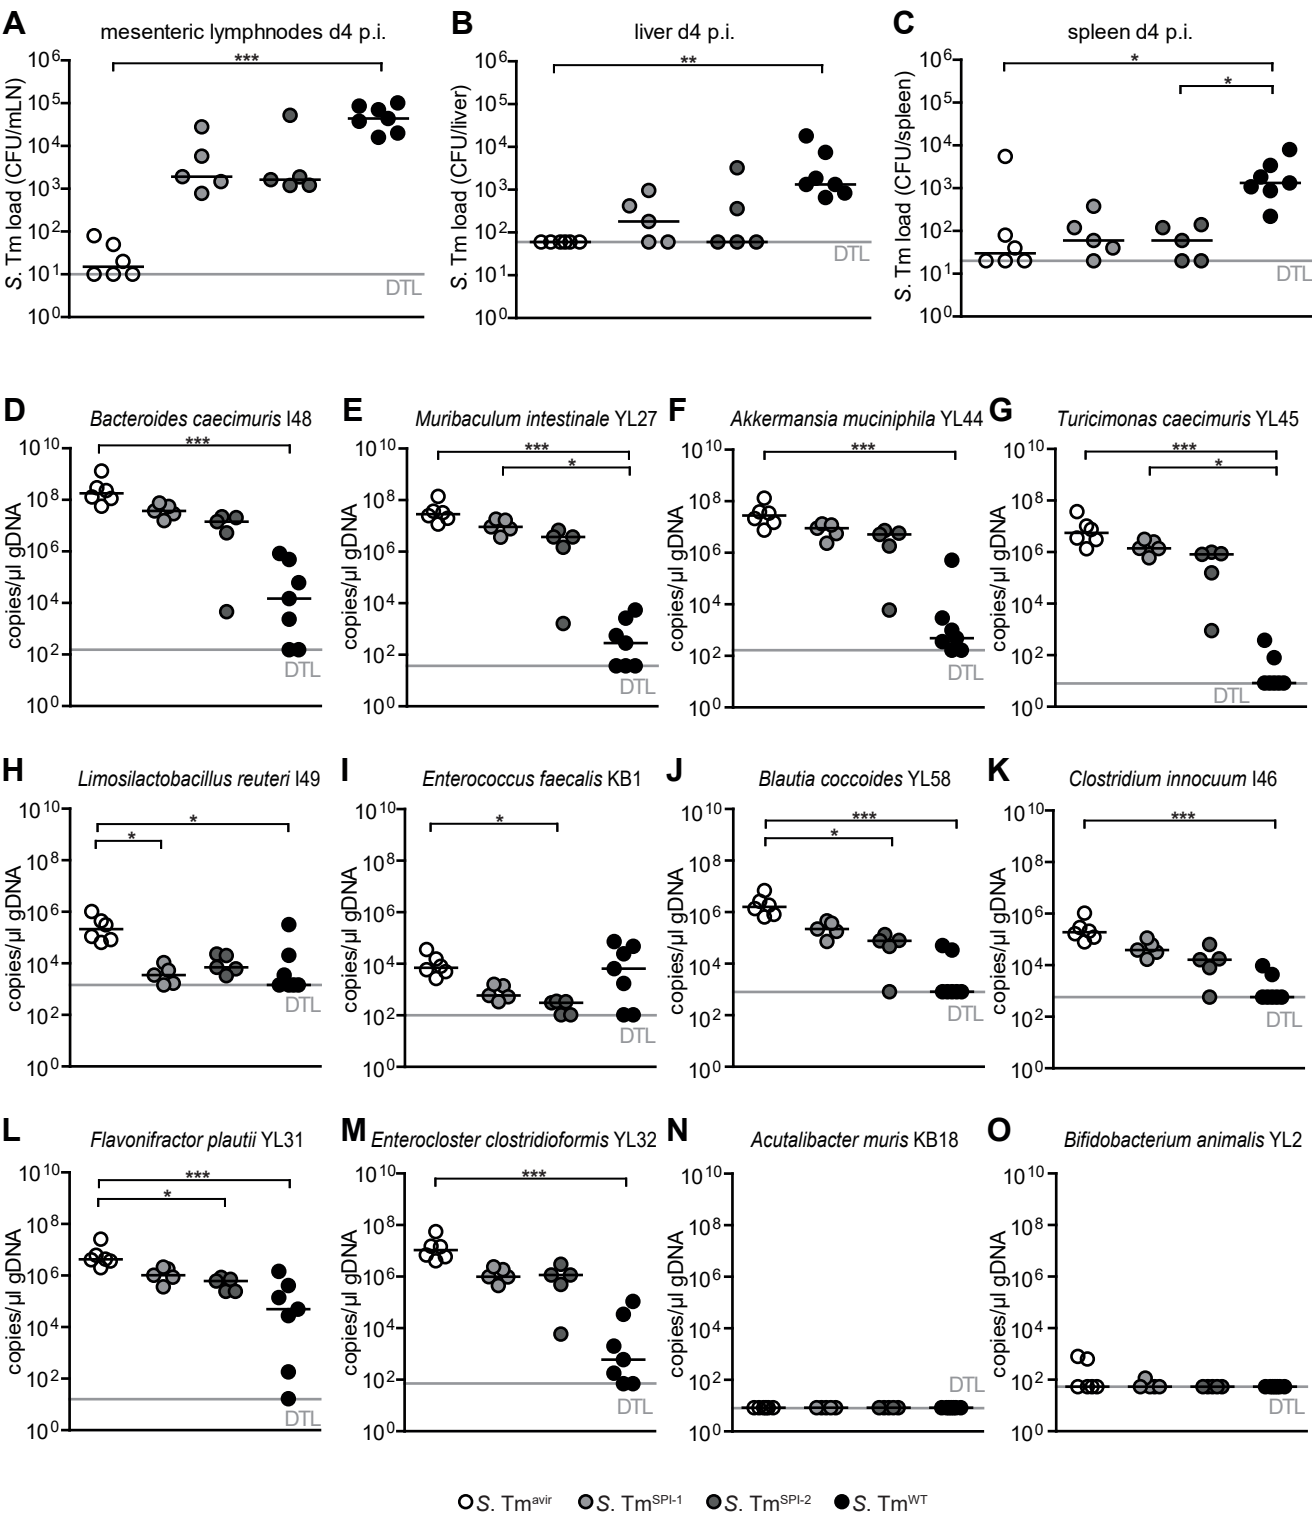

**Figure S5**

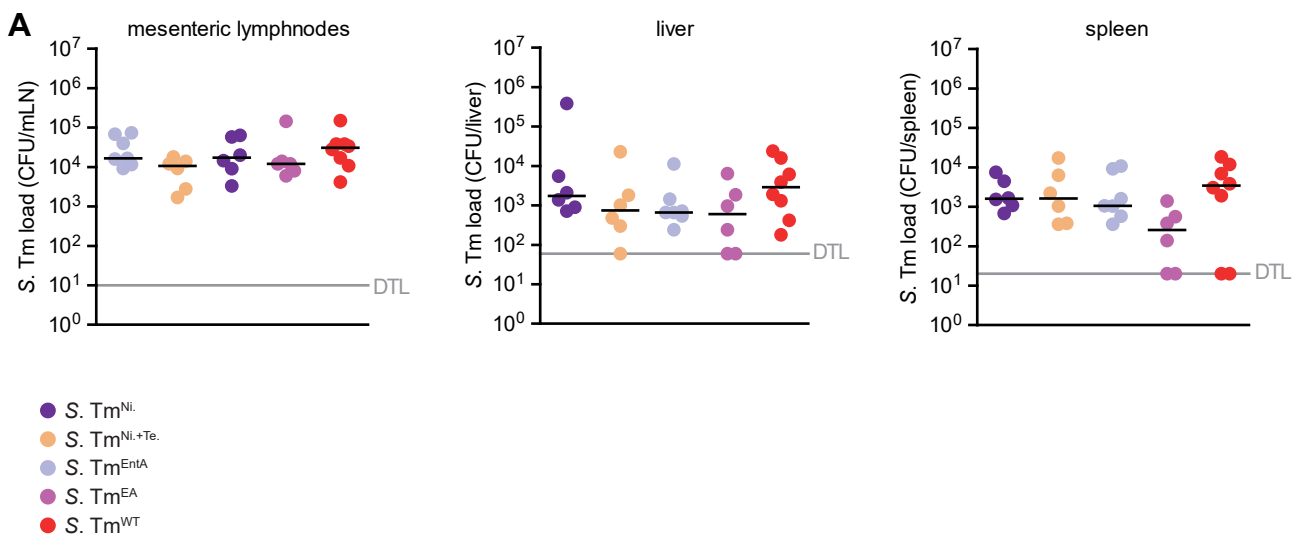



**Figure S6**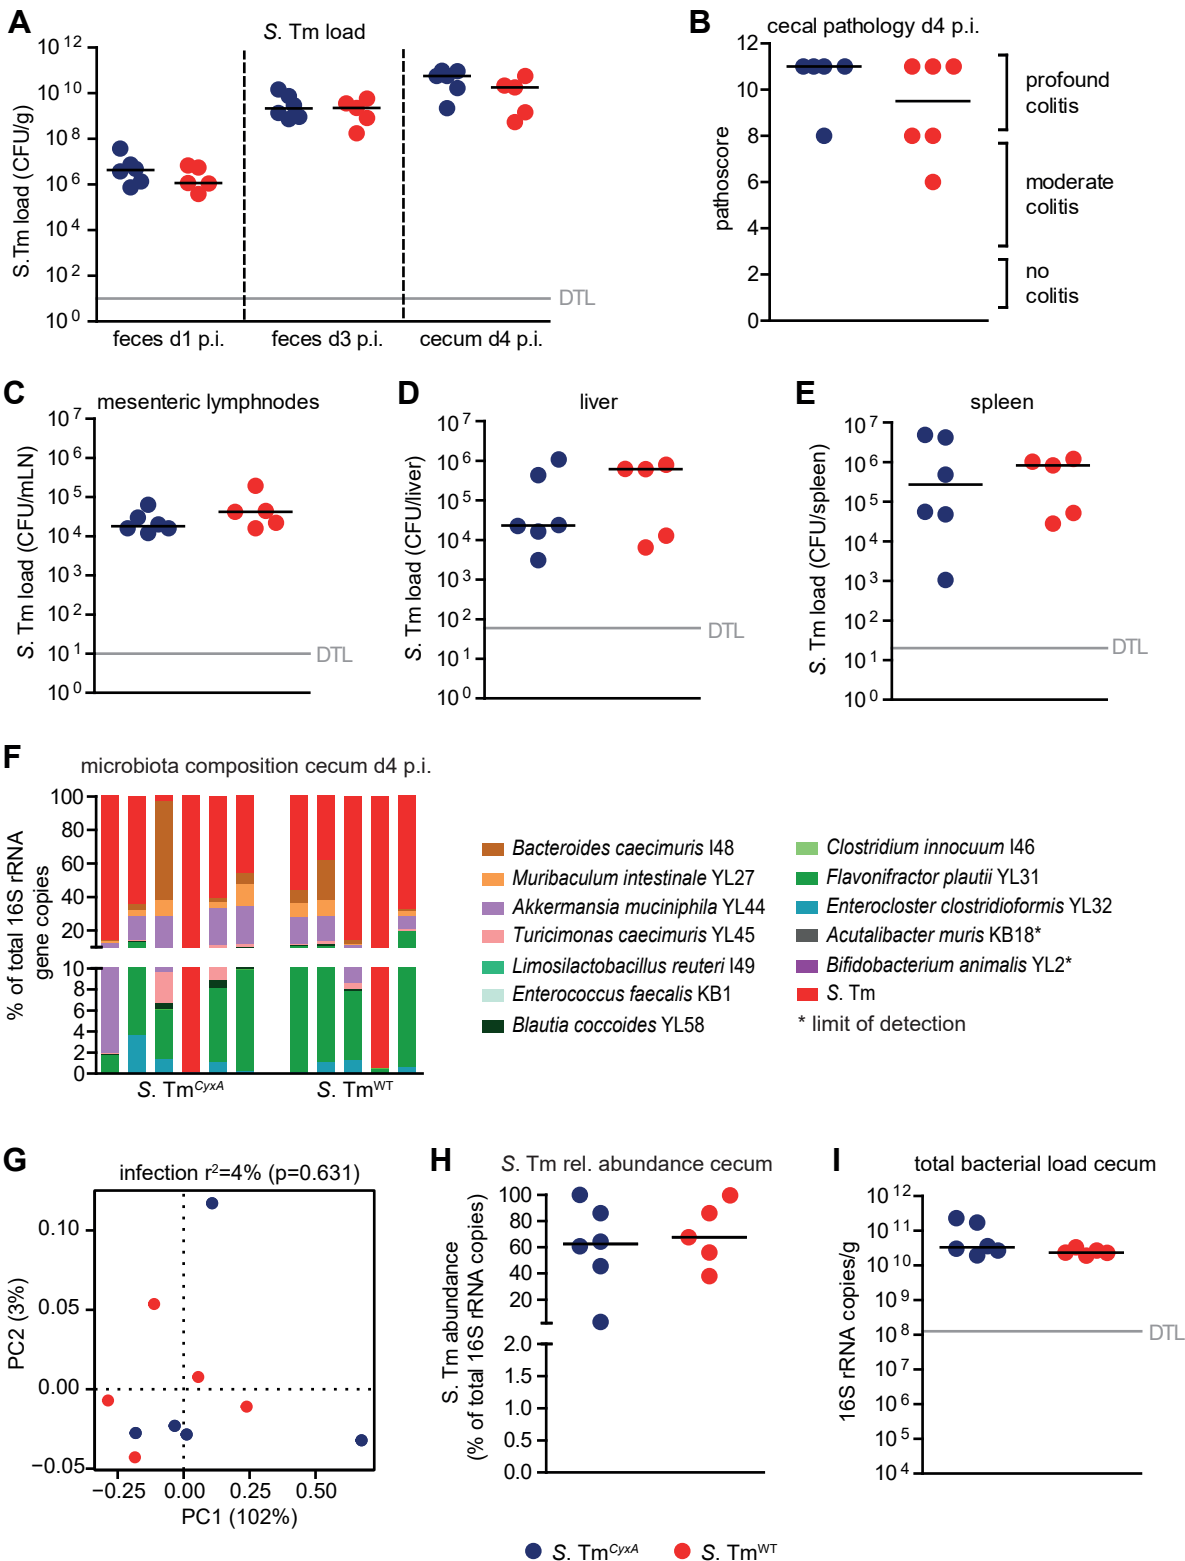

**Figure S7**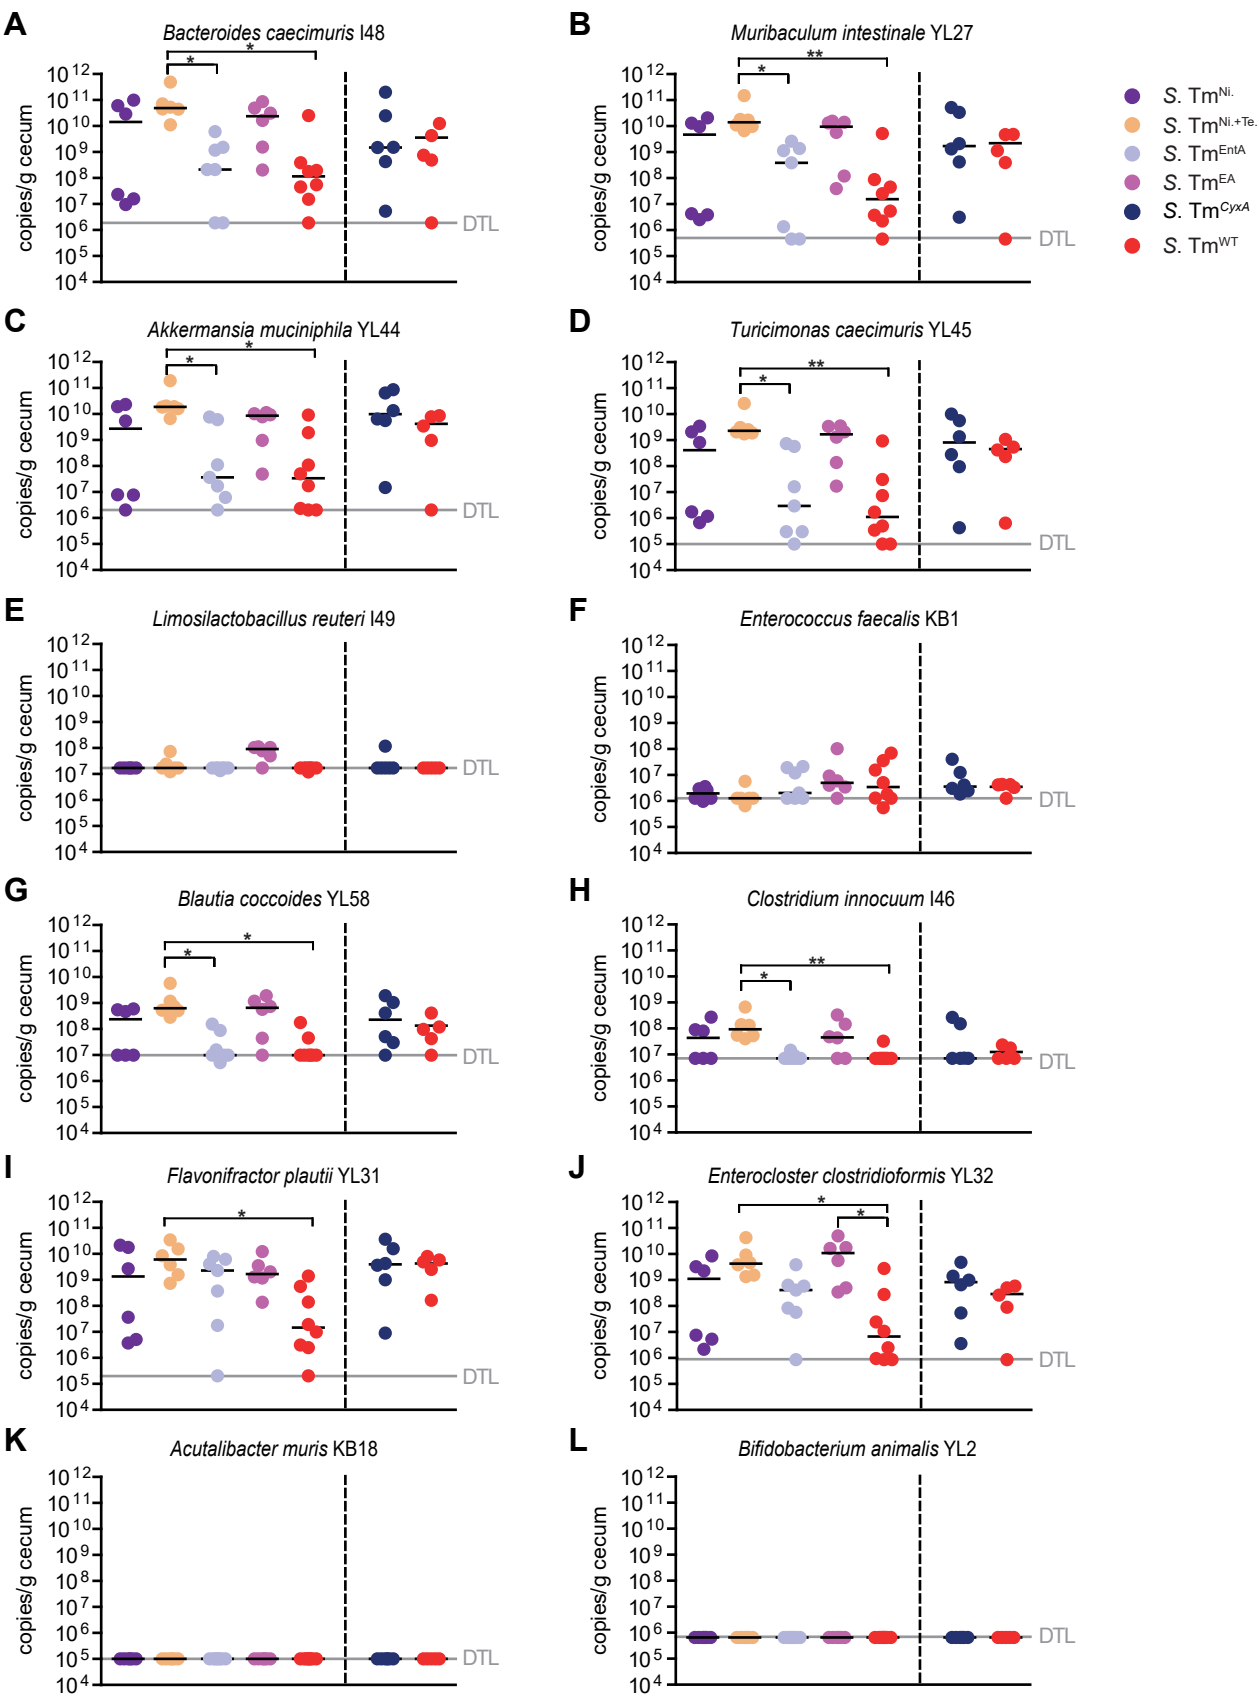

**Figure S8**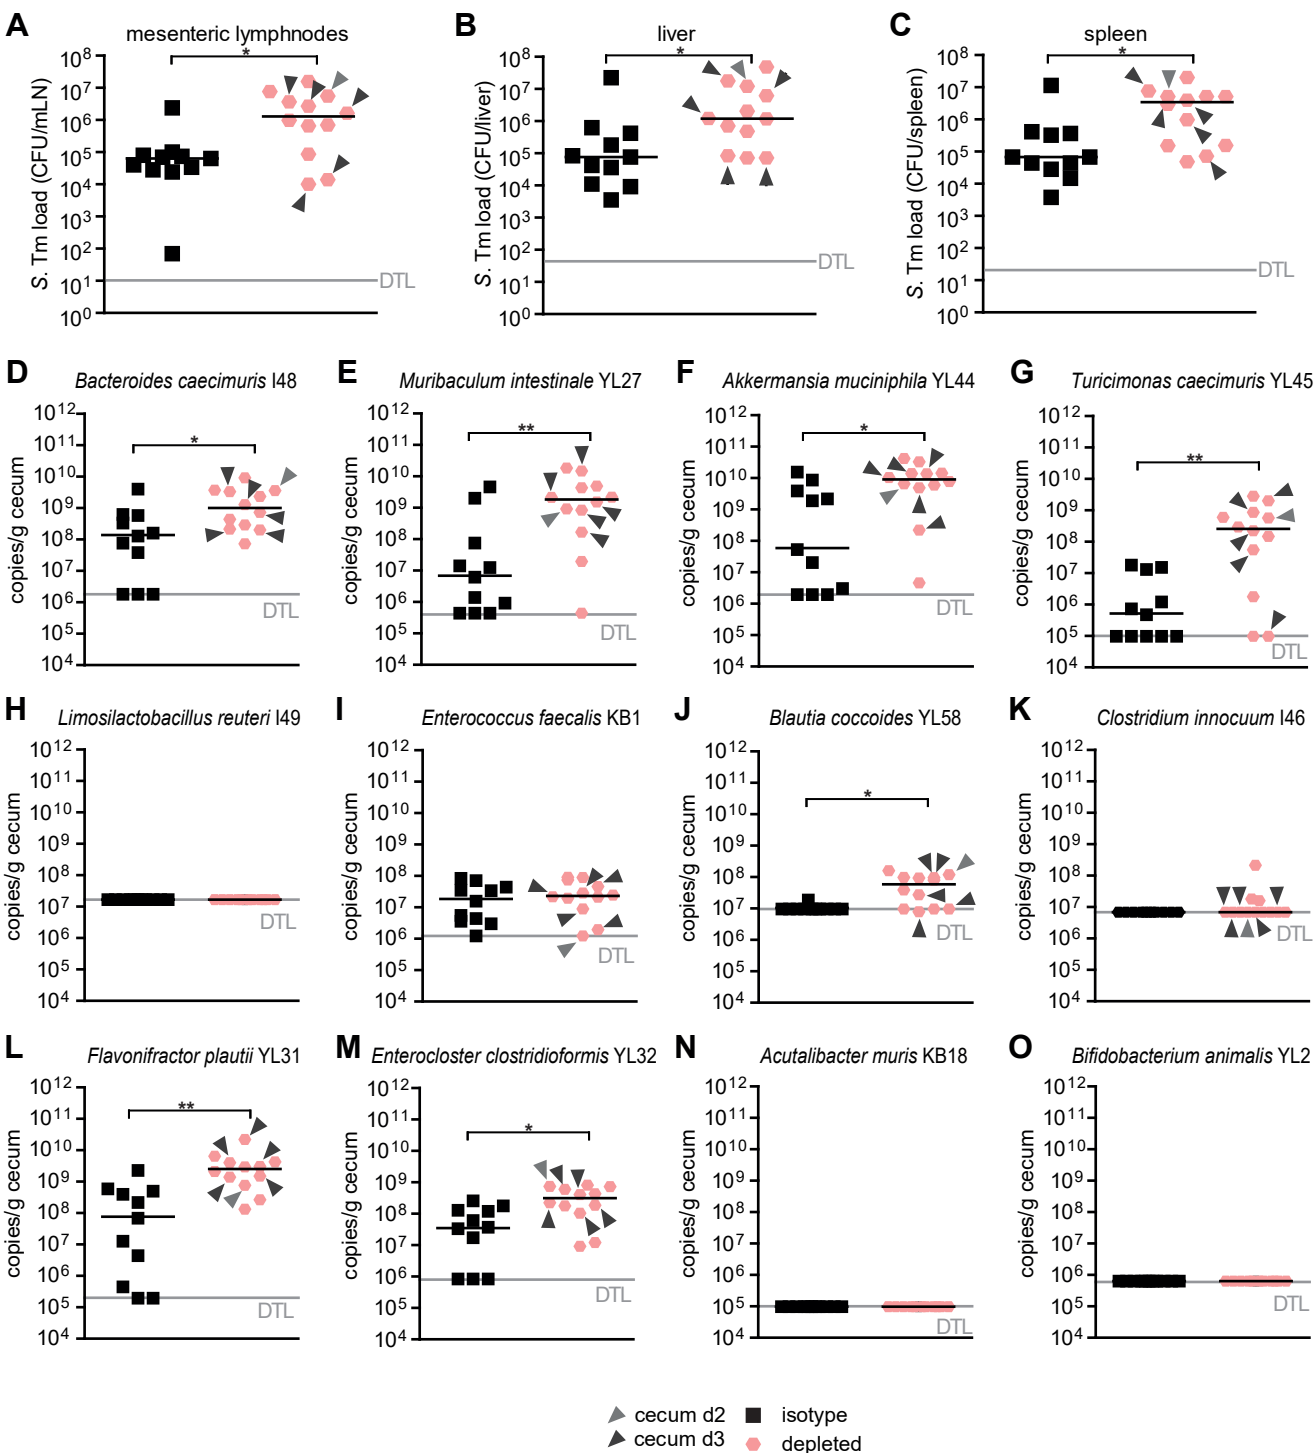

Supplement: iai.00318-23-s0001.pdf [file iai.00318-23-s0001.pdf]
